# Supplementary material for: Design, Synthesis and Biological Evaluation of Pentacyclic Triterpene Derivatives: Optimization of Anti-ABL Kinase Activity
Source: MDPI journal article supplement (doi:10.3390/molecules24193535), 2019-09-30
Supplement: s1 [file s1]

**Supplementary Material: NMR Data**  
**Design, Synthesis and Biological Evaluation of**  
**Pentacyclic Triterpene Derivatives:**  
**Optimization of Anti-ABL Kinase Activity**

Halil I. Ciftci, Mohamed O. Radwan, Safiye E. Ozturk, N. Gokce Ulusoy, Ece Sozer, Doha E. Ellakwa, Zeynep Ocak, Mustafa Can, Taha F.S. Ali, Howaida. I. Abd-Alla, Nurettin Yayli, Masami Otsuka\*, and Mikako Fujita\*

\* Corresponding authors

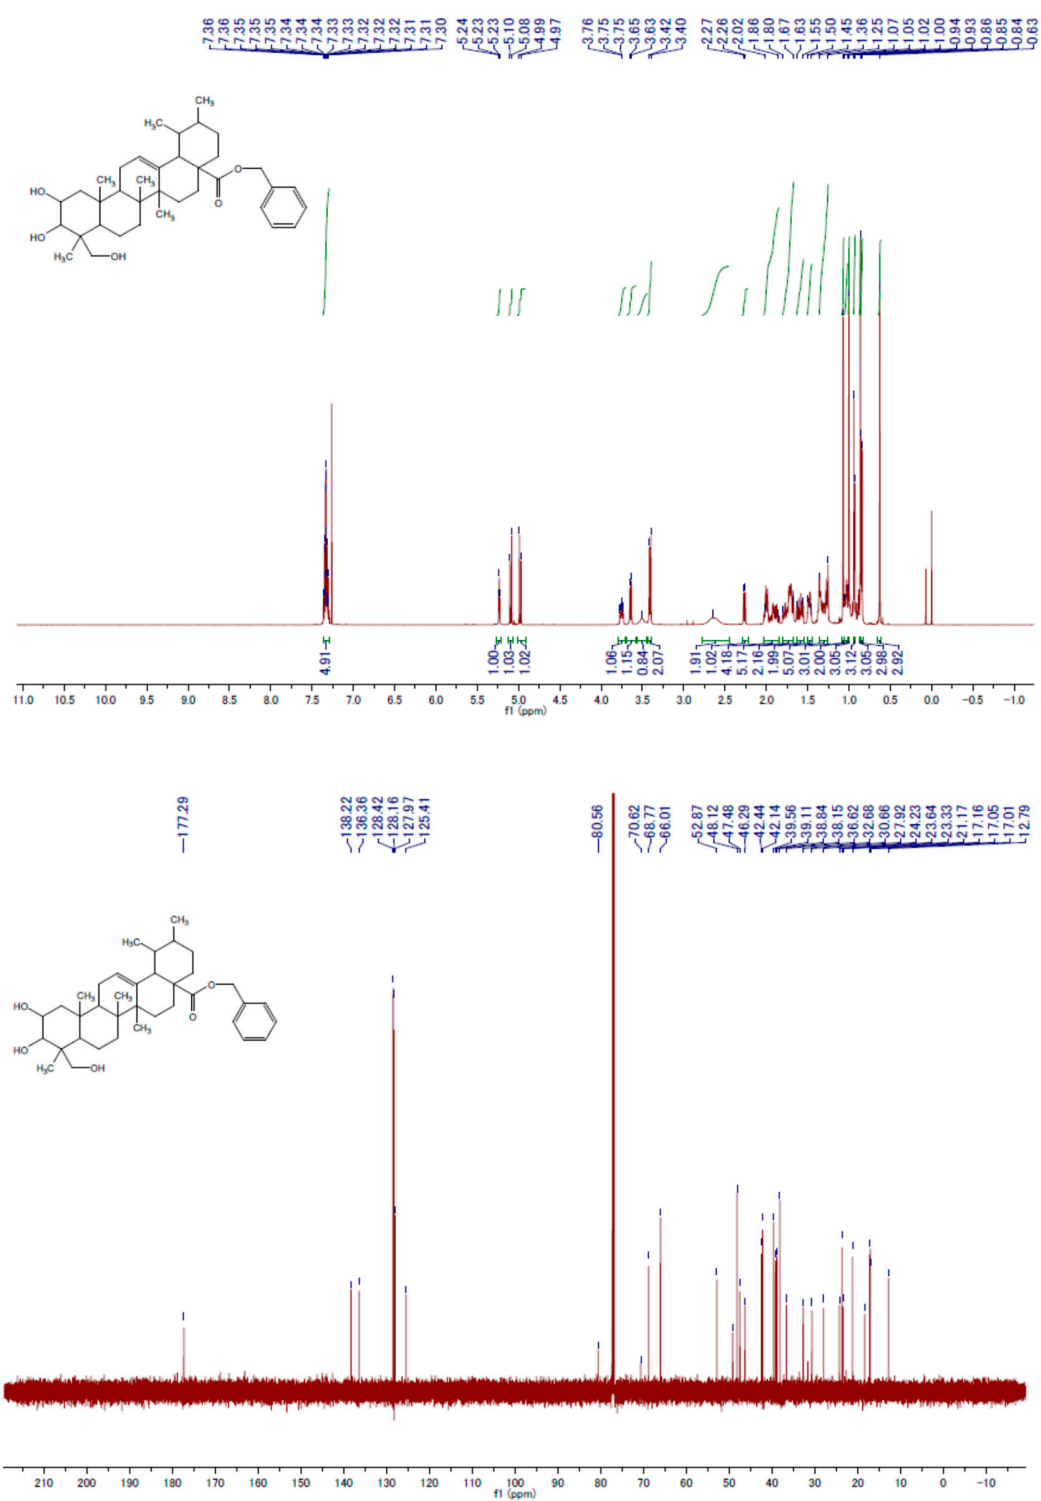

Figure S1: <sup>1</sup>H and <sup>13</sup>C spectra of **PT1**

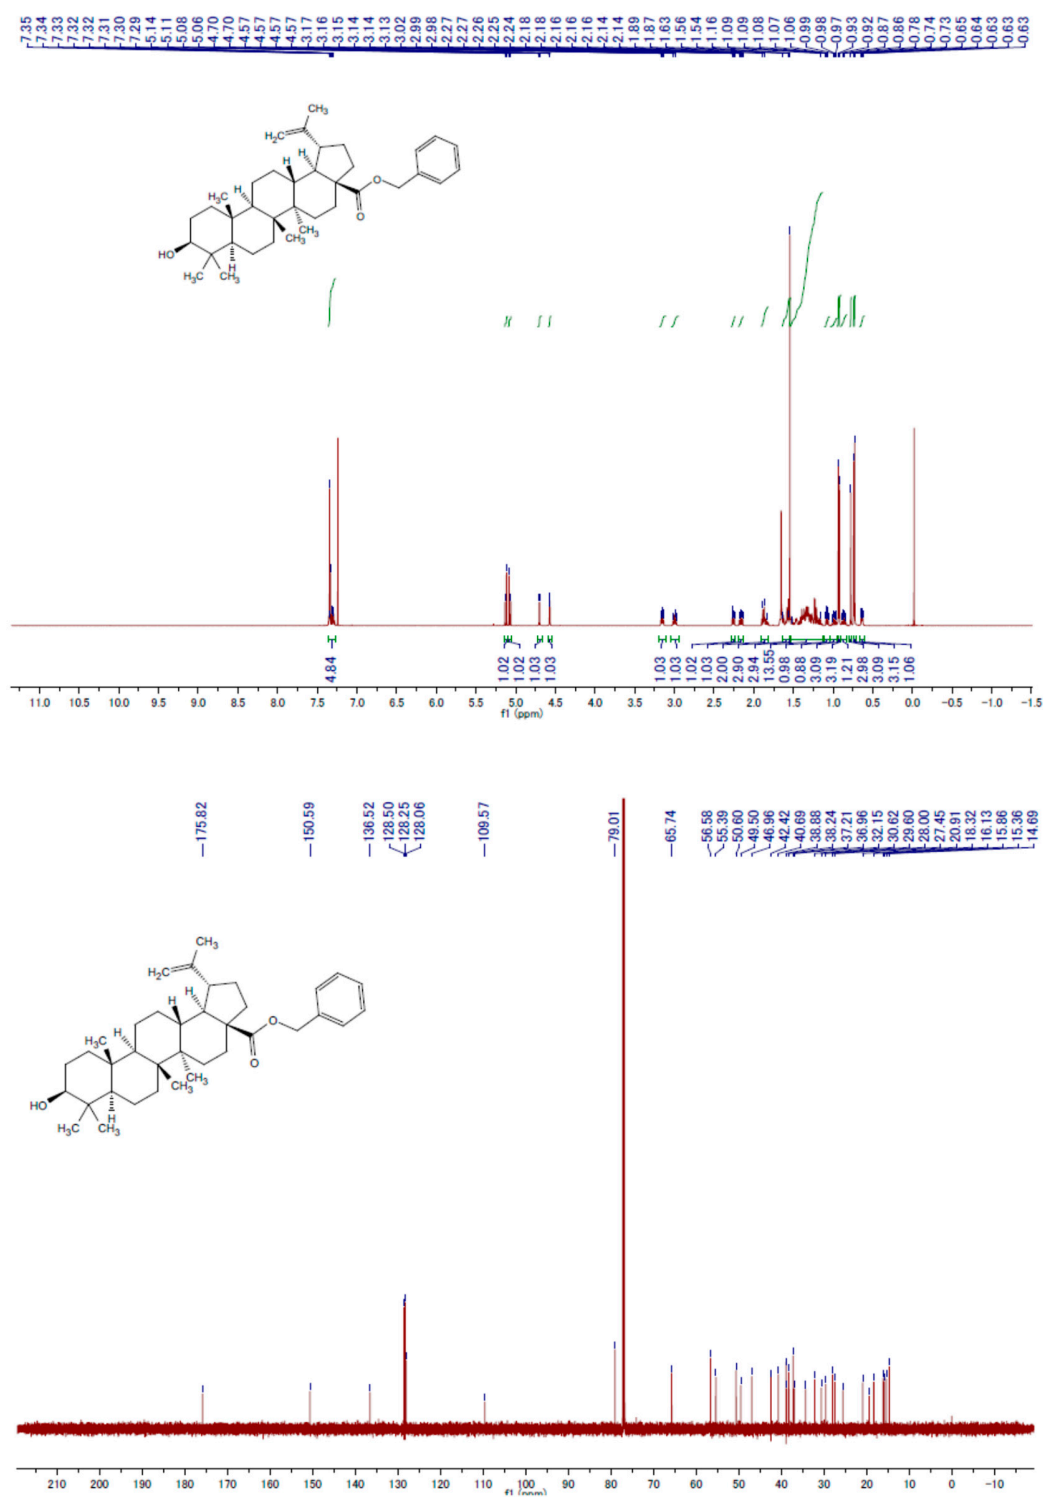

Figure S2: <sup>1</sup>H and <sup>13</sup>C spectra of PT2



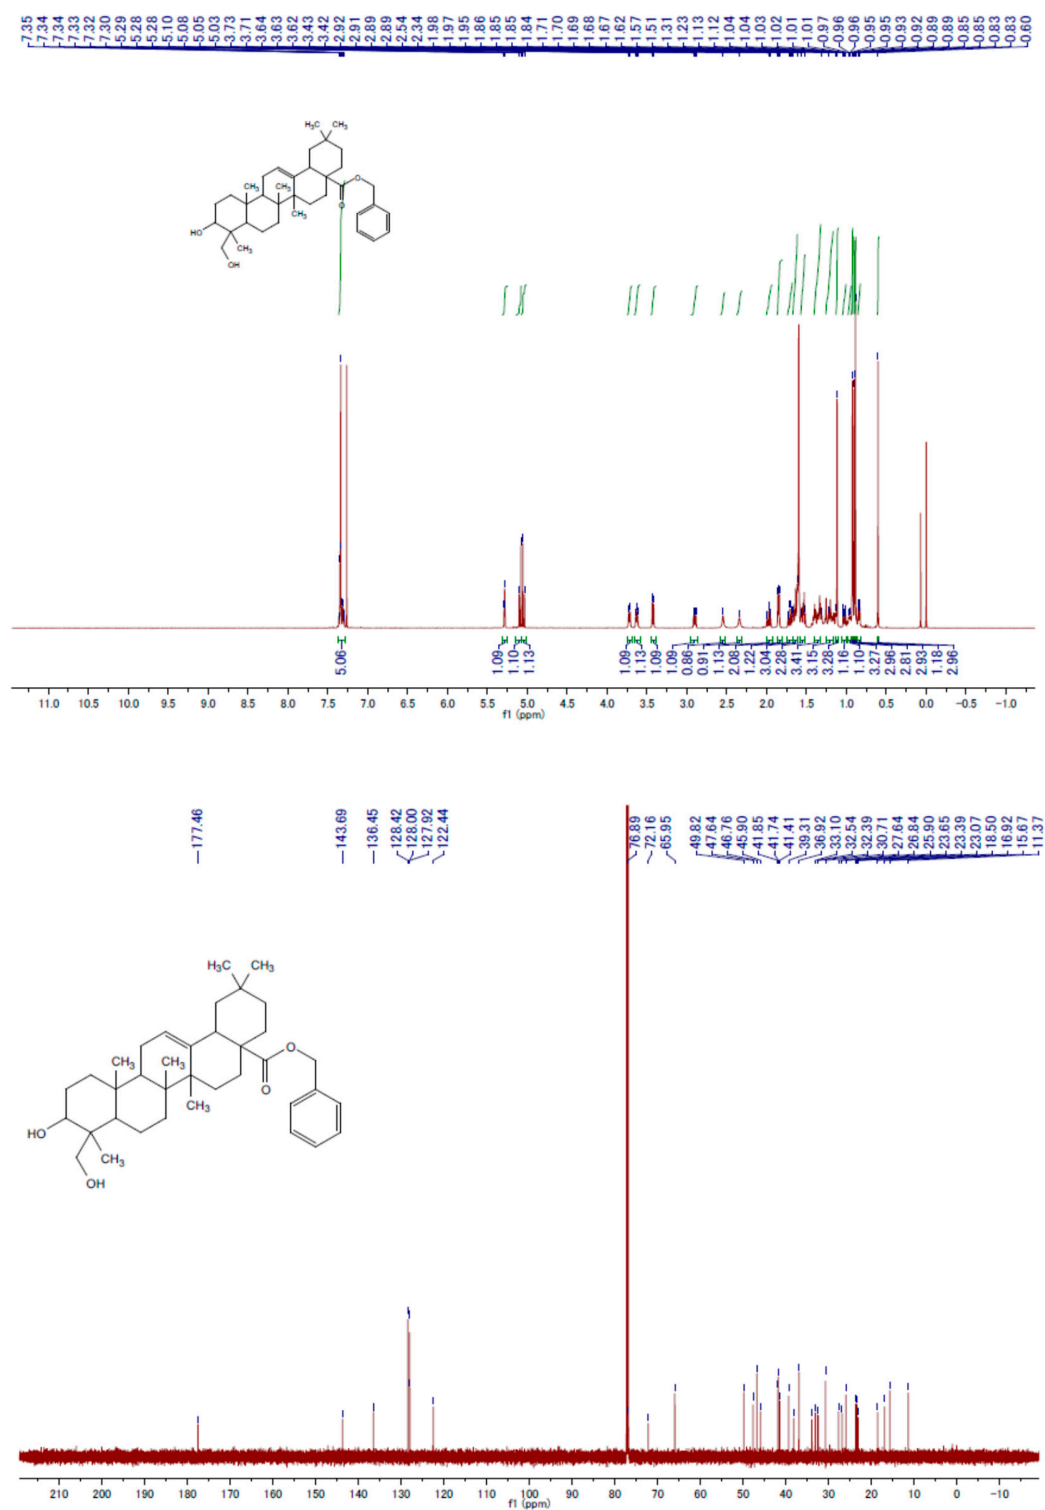

Figure S4: <sup>1</sup>H and <sup>13</sup>C spectra of PT4

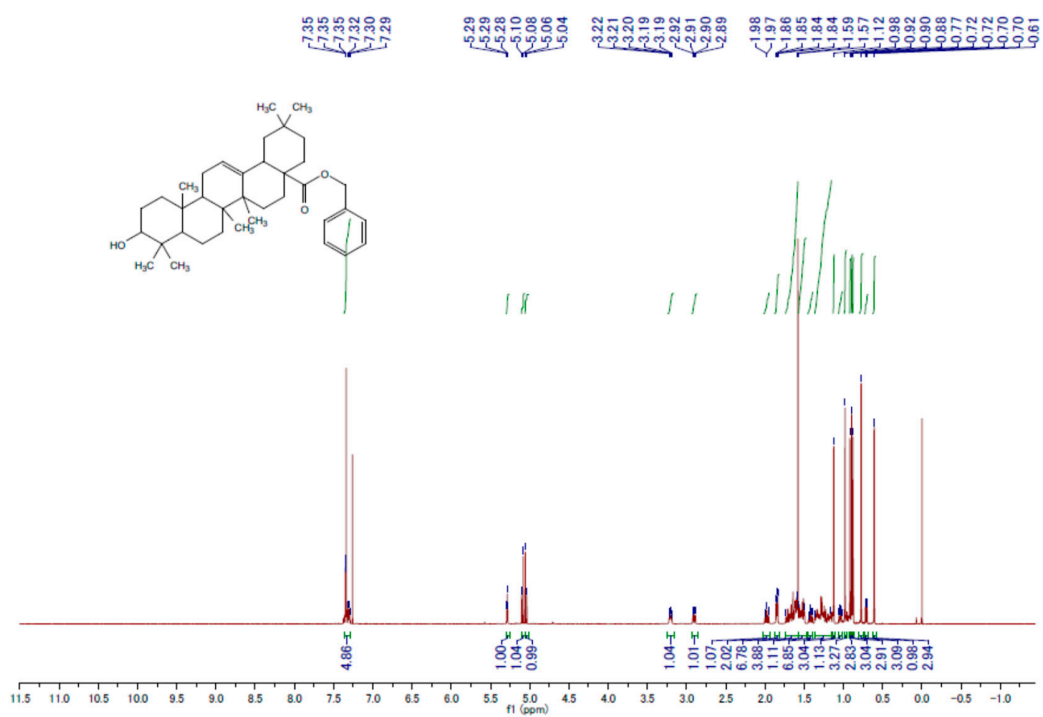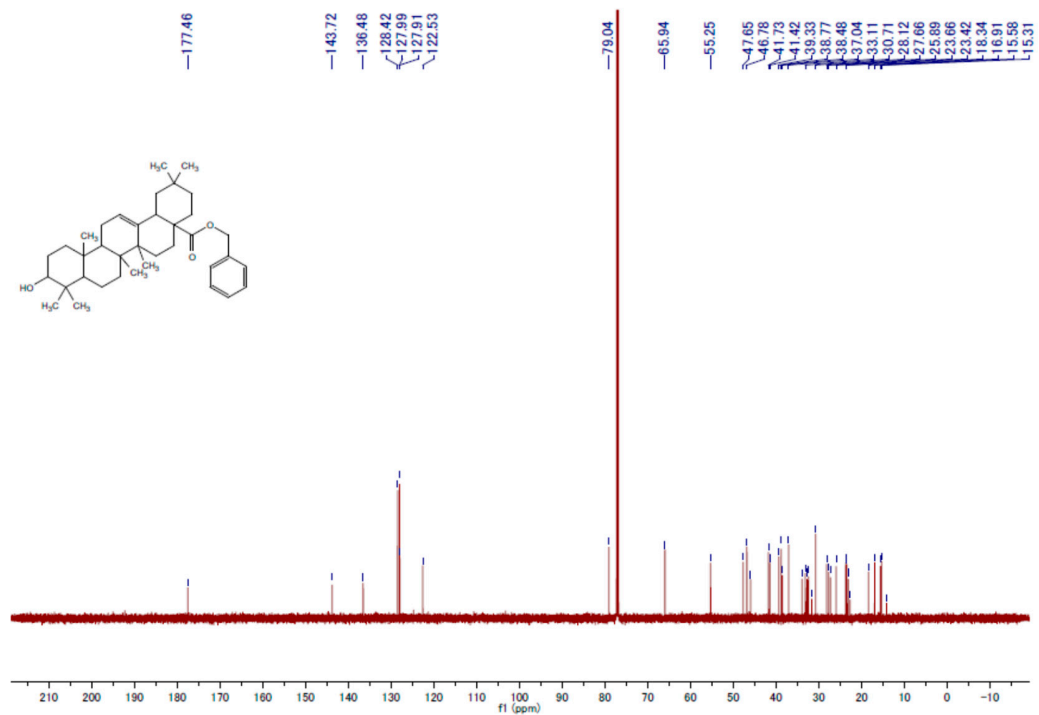

Figure S5: <sup>1</sup>H and <sup>13</sup>C spectra of PT5

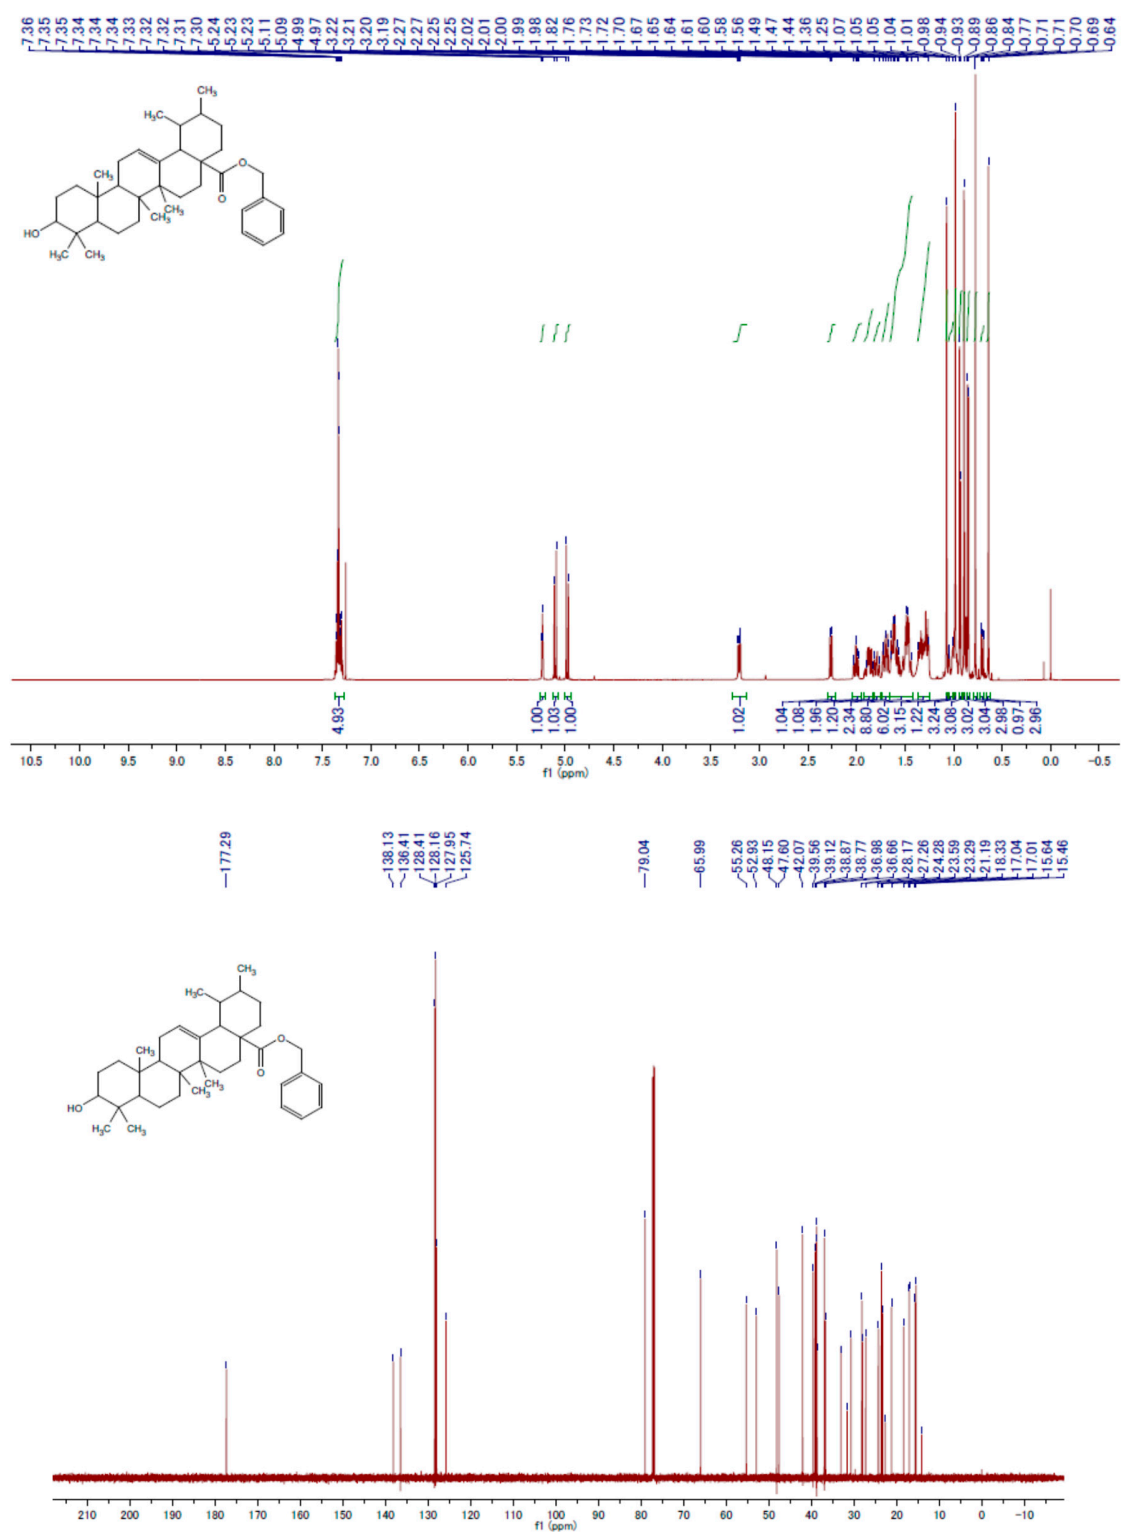

Figure S6: <sup>1</sup>H and <sup>13</sup>C spectra of PT6

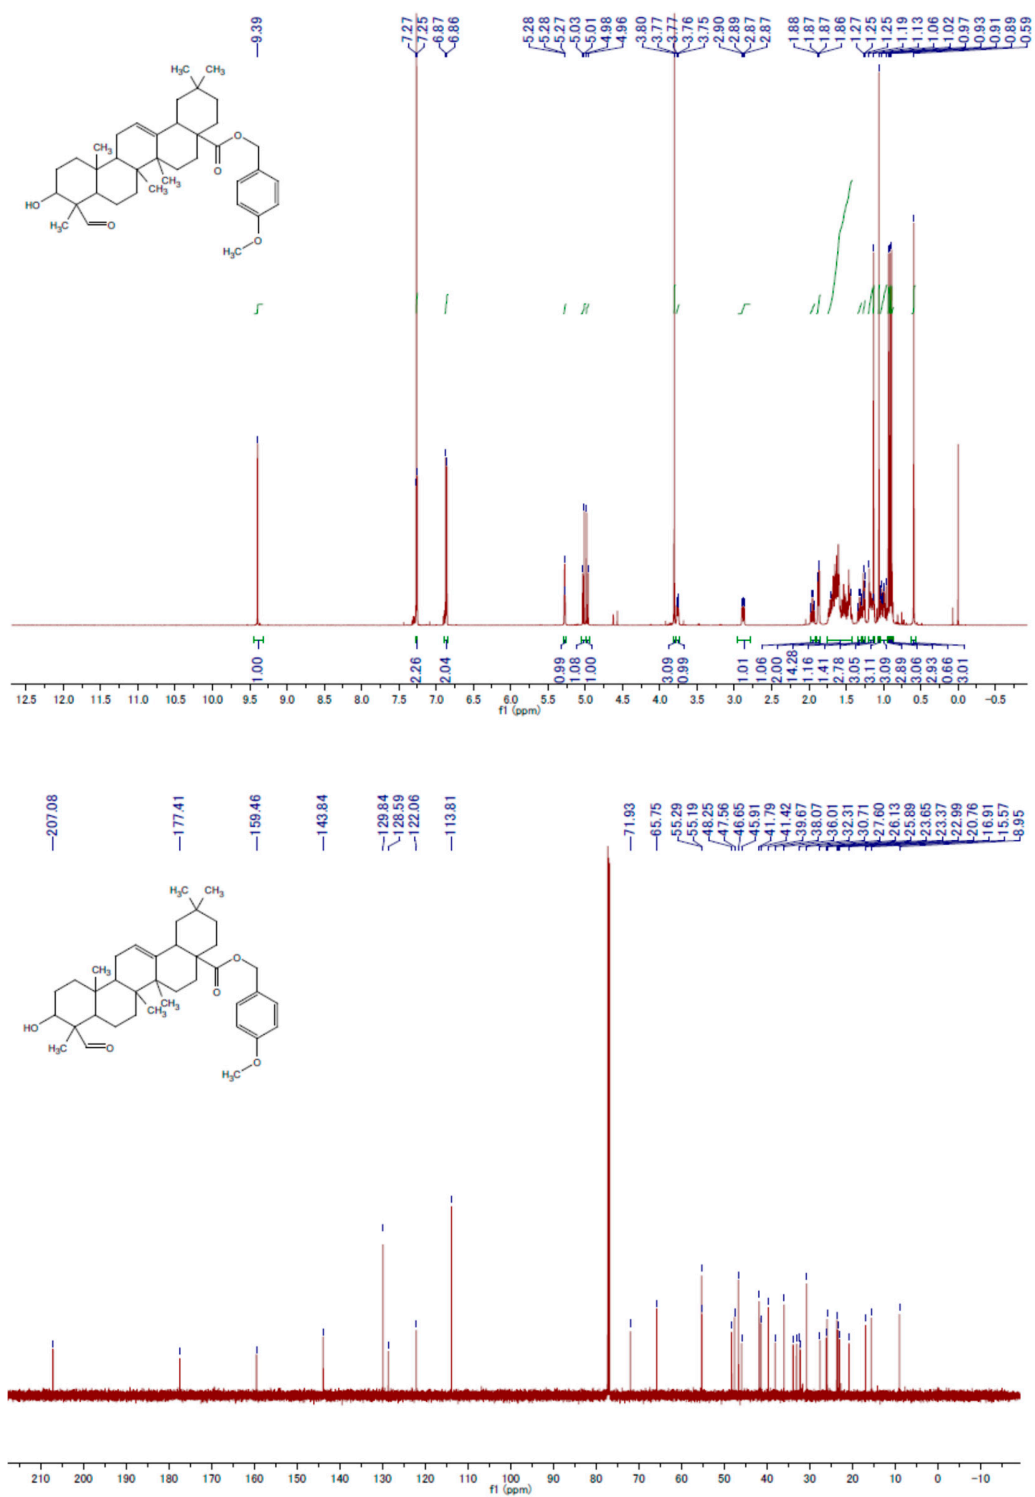

Figure S7: <sup>1</sup>H and <sup>13</sup>C spectra of GP1





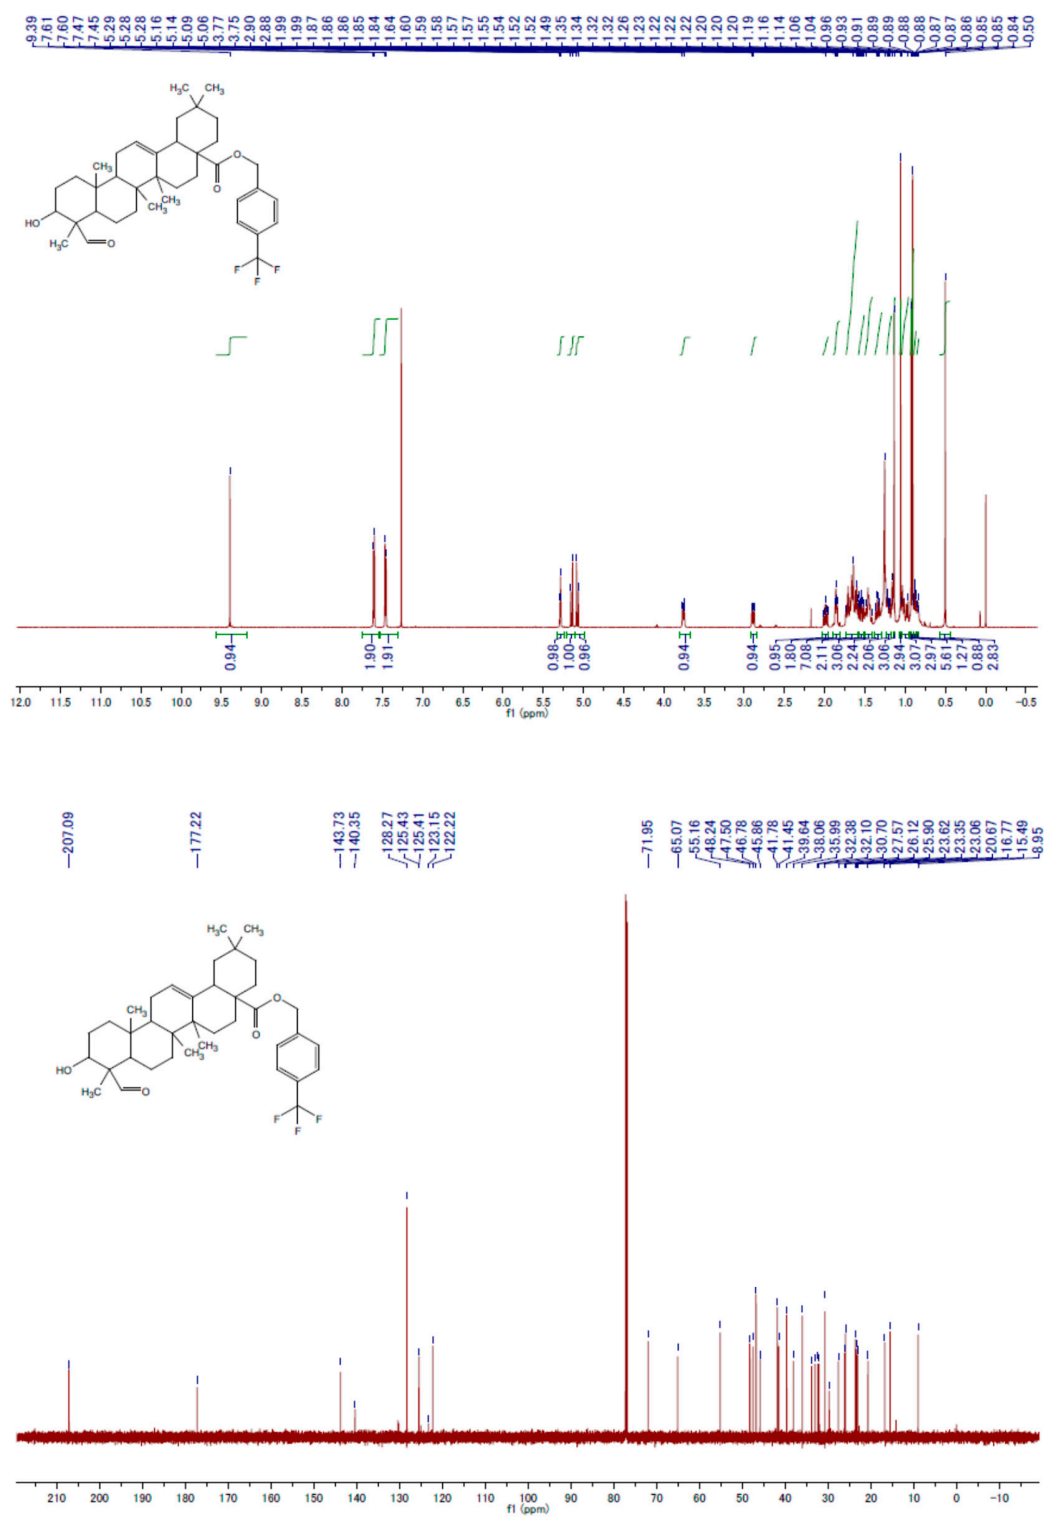

Figure S9: <sup>1</sup>H and <sup>13</sup>C spectra of GP3

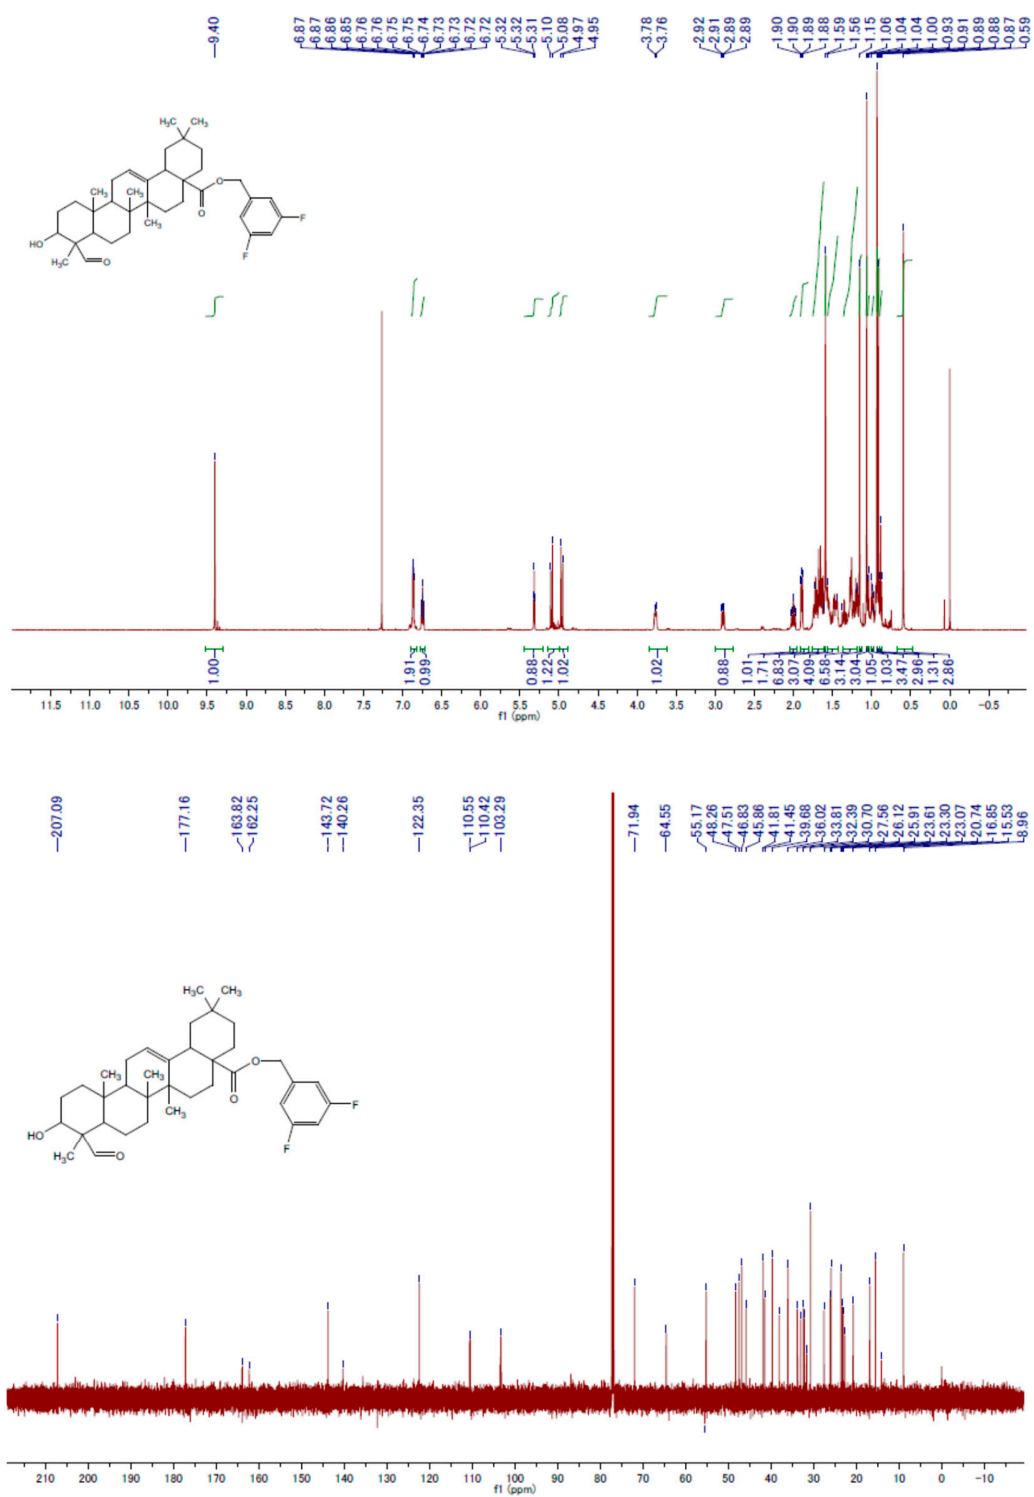

Figure S10: <sup>1</sup>H and <sup>13</sup>C spectra of GP4

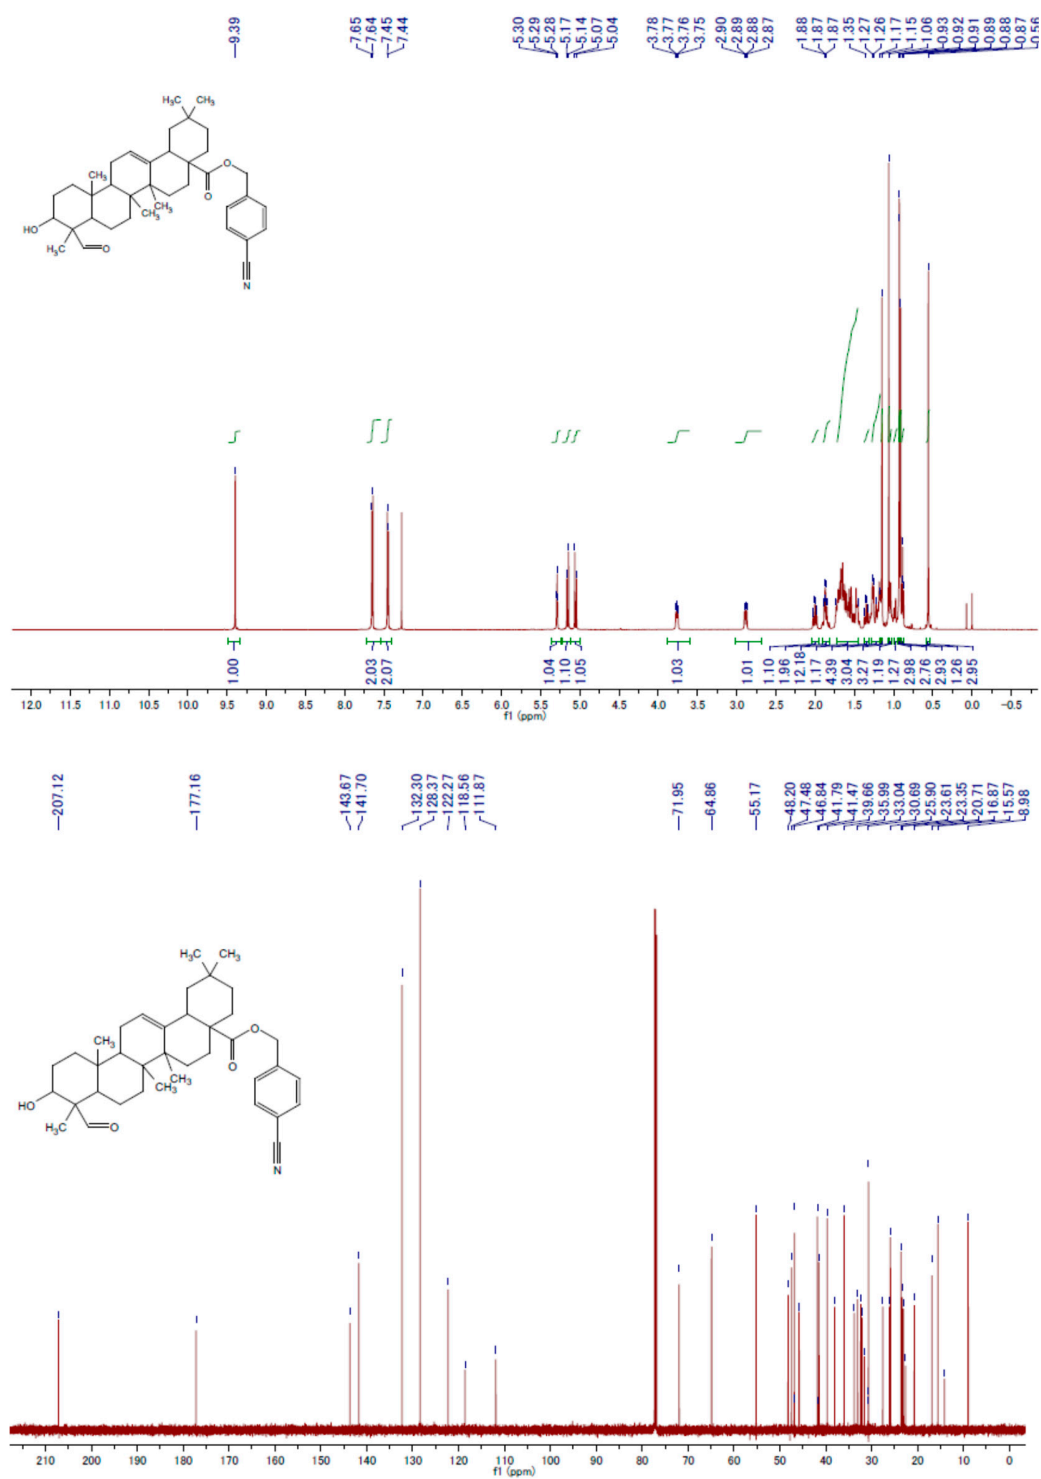

Figure S11: <sup>1</sup>H and <sup>13</sup>C spectra of GP5
